# Supplementary material for: Facile synthesis of nanostructured TiNb2O7 anode materials with superior performance for high-rate lithium ion batteries
Source: Royal Society of Chemistry journal article supplement (doi:10.1039/c5cc07052j), 2015-01-01
Supplement: c5cc07052j1.pdf [file c5cc07052j1.pdf]

## Supporting Information:

# Facile Synthesis of nanostructured $\text{TiNb}_2\text{O}_7$ anode materials with superior performance for high-rate lithium ion batteries

Shuaifeng Lou<sup>a</sup>, Yulin Ma<sup>a,b</sup>, Xinqun Cheng<sup>a</sup>, Jinlong Gao<sup>a</sup>, Yunzhi Gao<sup>a</sup>, Pengjian Zuo<sup>a</sup>,  
Chunyu Du<sup>a</sup> and Geping Yin<sup>a\*</sup>

<sup>a</sup> Institute of Advanced Chemical Power Sources, School of Chemical Engineering and Technology, Harbin Institute of Technology, Harbin 150001, China.

<sup>b</sup> Energy Storage & Distributed Resources Division, Lawrence Berkeley National laboratory, Berkeley CA 94720, USA

E-mail: yingeping@hit.edu.cn

Tel: +86-0451-86403807

## Experimental Section

**Preparation of  $\text{TiNb}_2\text{O}_7$ :**  $\text{TiNb}_2\text{O}_7$  nanorods were prepared through a simple sol-gel method. First,  $\text{Nb}_2\text{O}_5$  (Sinopharm Chemical Reagent, analytically pure) was added to a hydrofluoric acid solution (Sinopharm Chemical Reagent, 40 wt.%) and stirred for about 4 hours at 70°C. After the solution became transparent, excess ammonium hydroxide was added and then a white  $\text{Nb}(\text{OH})_5$  precipitated. The solid was filtered, washed and dried. 1.78g of the obtained  $\text{Nb}(\text{OH})_5$  was added in an oxalic acid solution at 80°C to form transparent solution including  $\text{Nb}^{5+}$ , with the pH value adjusted by controlling the amount of oxalic acid. Meanwhile, 1.7 ml tetrabutyltitanate (Sinopharm Chemical Reagent, analytically pure) was added into absolute ethanol with a little oxalic acid and then stirred vigorously. Subsequently, The resulted light yellow solution was added to the  $\text{Nb}^{5+}$ -contained oxalic acid solution slowly. The mixed solution was then stirred and heated at 90°C to completely remove ethanol and water. The obtained white powder was calcined at 900°C in air to obtain the slightly yellow  $\text{TiNb}_2\text{O}_7$  product.

**Materials characterization:** The size and morphology of the  $\text{TiNb}_2\text{O}_7$  powders were characterized

using a Helios Nanolab 600i high-resolution Field emission Scanning Electron Microscope (FESEM) operated at 10 kV. X-ray powder diffraction (XRD) was carried out on a Rigaku D/max- $\gamma$ A X-ray diffractometer with  $\text{CuK}\alpha$  radiation ( $\lambda=1.54178 \text{ \AA}$ ). The FTIR spectra was collected using a ThermoNicolet iS10 FT-IR spectrometer with an attenuated total reflectance(ATR) unit. Transmission electron microscopy (TEM) and high resolution TEM (HR-TEM) images were taken with a TecnaiG2F30 transmission electron microscope with an acceleration voltage of 300 kV. X-ray photoelectron spectra (XPS) was recorded on a PHI 5700 ESCA system fitted with  $\text{Al K}\alpha$  radiation. The energy calibration and deconvolution of XPS peaks were calculated using a XPSPEAK software.

***Electrode fabrication and electrochemical measurements:*** The working electrodes were fabricated as follows. First, the  $\text{TiNb}_2\text{O}_7$  nanostructured materials (70 wt.%), acetylene black (20 wt.%), and polyvinylidene fluoride (PVDF, 10 wt.%) were mixed and then stirred in N-methyl-2-pyrrolidone (NMP) to form a black slurry. Then, the black slurry was spread onto a Cu foil by a doctor blade method, followed by drying in vacuum at  $120^\circ\text{C}$  for 12 h. The average loading weight of the active material in the coin cell fabrication is  $\sim 2$  mg. Lithium metal was used as both the counter electrode and the reference electrode, and a porous polypropylene membrane (Celgard 2500) was used as the separator. CR2025-type coin cells were assembled in an argon-filled glove box with both moisture and oxygen contents below 0.5 ppm. The electrolyte was 1M  $\text{LiPF}_6$  in ethylene carbonate/dimethyl carbonate/ethyl methyl carbonate (EC/DMC/EMC, 1:1:1 by volume). The galvanostatic charge/discharge test (1.0-3.0V) was performed on a Neware-CT3008 test system under ambient temperature.

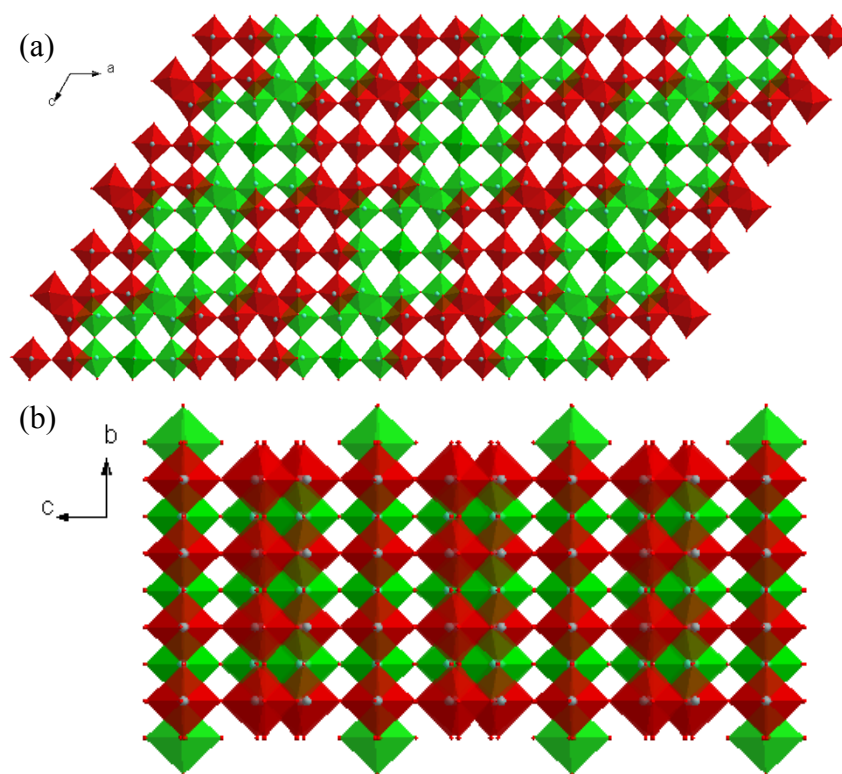

Fig. S1 Crystal structure of  $\text{TiNb}_2\text{O}_7$  oxide with a  $\text{ReO}_3$ -type structure, (a)  $ac$  plane and (b)  $bc$  plane.

The red blocks and green blocks represent the  $\text{MO}_6$  ( $M=\text{Ti}, \text{Nb}$ ) octahedra ( $\text{TiO}_6$  and  $\text{NbO}_6$  octahedra show a random arrangement) on the adjoining layers, and each of these blocks contains nine  $\text{MO}_6$  ( $3 \times 3$ ) octahedra.

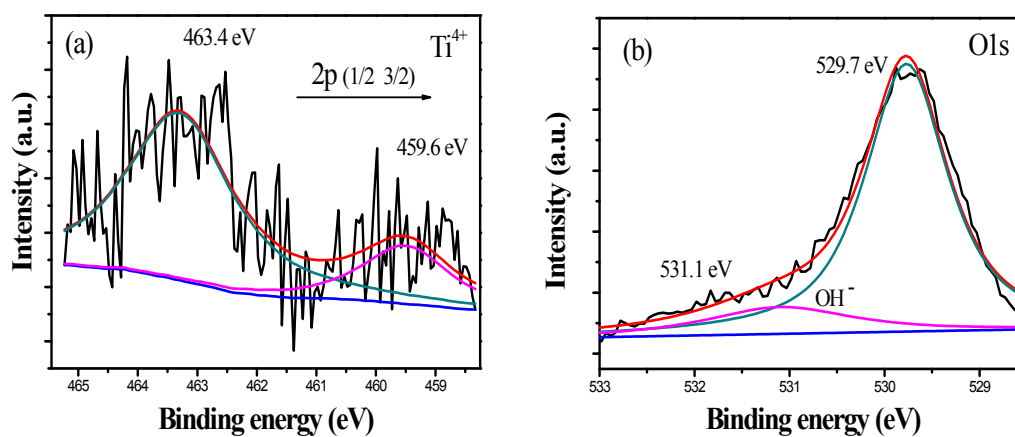

Fig. S2 XPS spectra of Ti and O elements in nanostructured  $\text{TiNb}_2\text{O}_7$ .

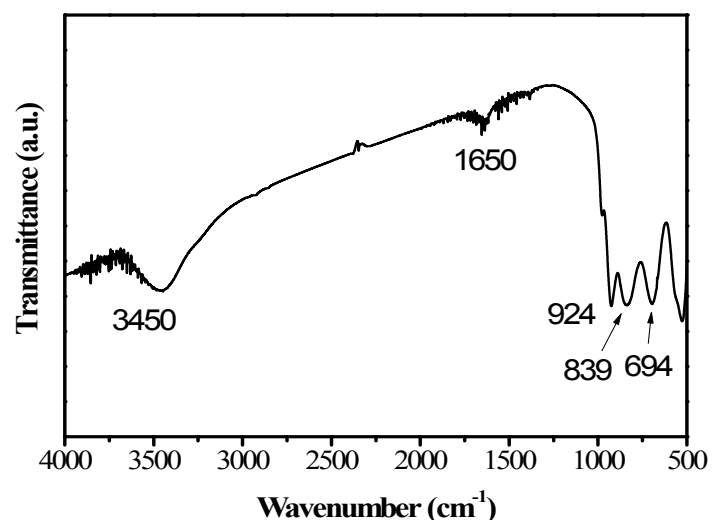

Fig. S3 FTIR of TiNb<sub>2</sub>O<sub>7</sub> nanostructured materials.

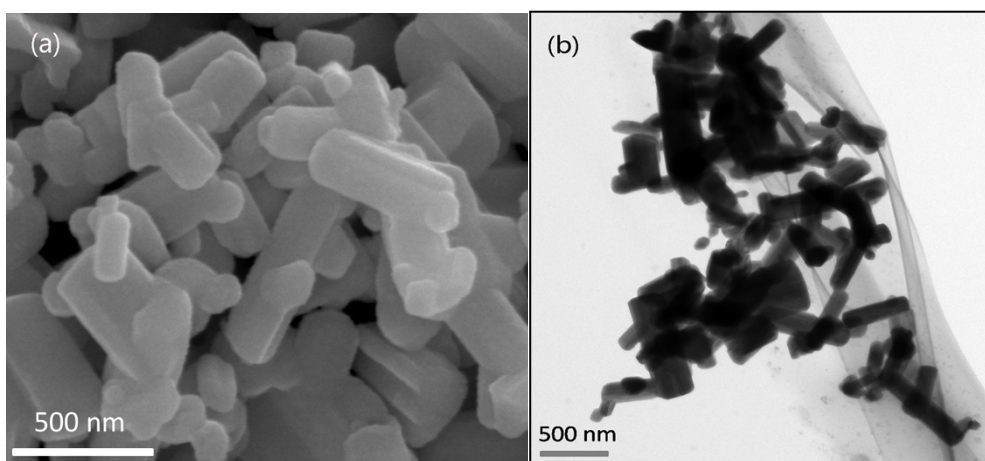

Fig. S4 (a) The SEM and (b) TEM image of TiNb<sub>2</sub>O<sub>7</sub> nanostructured materials.

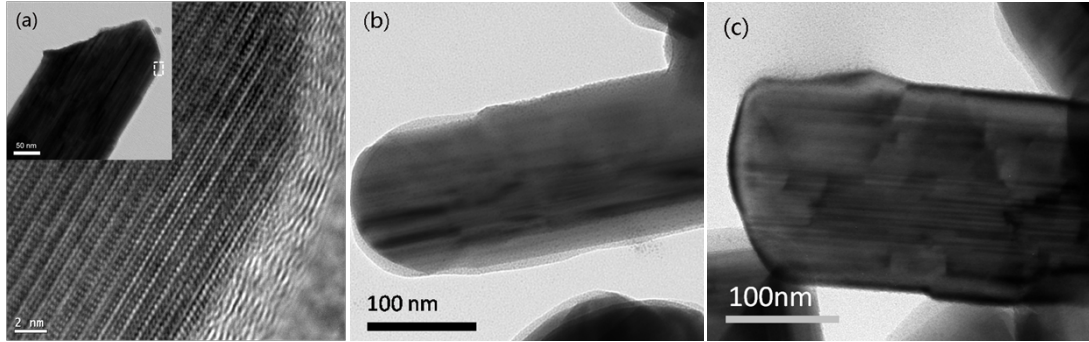

Fig. S5 The orientation of  $\text{TiNb}_2\text{O}_7$  nanorod materials.

The structural orientation shows a consistency results that crystal lattice fringes are parallel to the axial direction of the  $\text{TiNb}_2\text{O}_7$  rod. Fig. S5(a) is the enlarge image of the box in the inset image. Fig. S5 (b) and (c) are the representational TEM images in the products.

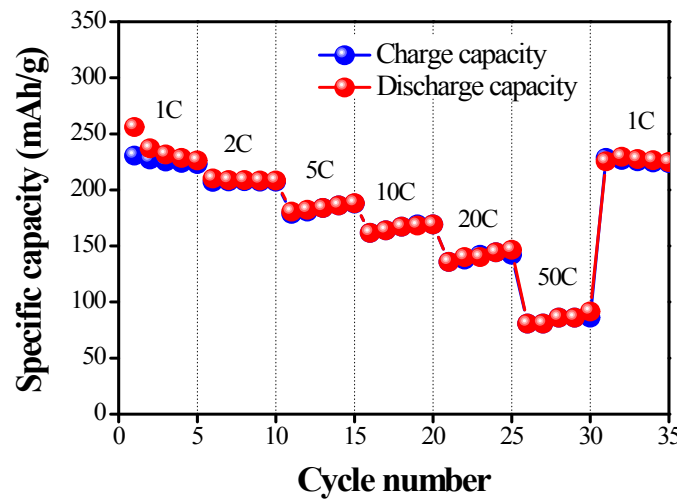

Fig. S6 Rate performance of  $\text{TiNb}_2\text{O}_7$  electrodes at various rates (1 C, 2 C, 5 C, 10 C, 20 C, 50 C)
